# Supplementary material
Source: MDPI journal article supplement (https://www.mdpi.com/2071-1050/15/8/6842)
Supplement: s1 [file s1]

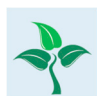**Table S1.** Physicochemical characteristic of the active layer with different earthworm density.

| Parameter | Unit               | Zone A (~ 1,100 worm/m <sup>3</sup> ) | Zone B (~ 7,000 worm/m <sup>3</sup> ) |
|-----------|--------------------|---------------------------------------|---------------------------------------|
| pH        | -                  | 3.9 ± 0.2                             | 4.8 ± 0.5                             |
| ORP       | mV                 | 239.2 ± 29.6                          | 367.5 ± 38.7                          |
| EC        | µs/cm              | 266.9 ± 30.2                          | 155.1 ± 33.4                          |
| Biofilm   | gVS/m <sup>2</sup> | 35.6 ± 9.8                            | 48.0 ± 21.5                           |
| Humidity  | %                  | 73%                                   | 76%                                   |

**Note:** ORP: oxidation-reduction potential; EC: electric conductivity; VS: volatile solids; Biofilm: Volatil solid per m<sup>2</sup> of active layer, Humidity: % moisture of active layer.
